# Supplementary material
Source: Springer Nature journal article supplement (https://www.springermedizin.de/resource/supplementary/12885_2011_2917_MOESM1_ESM.pdf/9462284)
Supplement: MOESM1 [file 9462284]

## ROC Curves for Comparisons

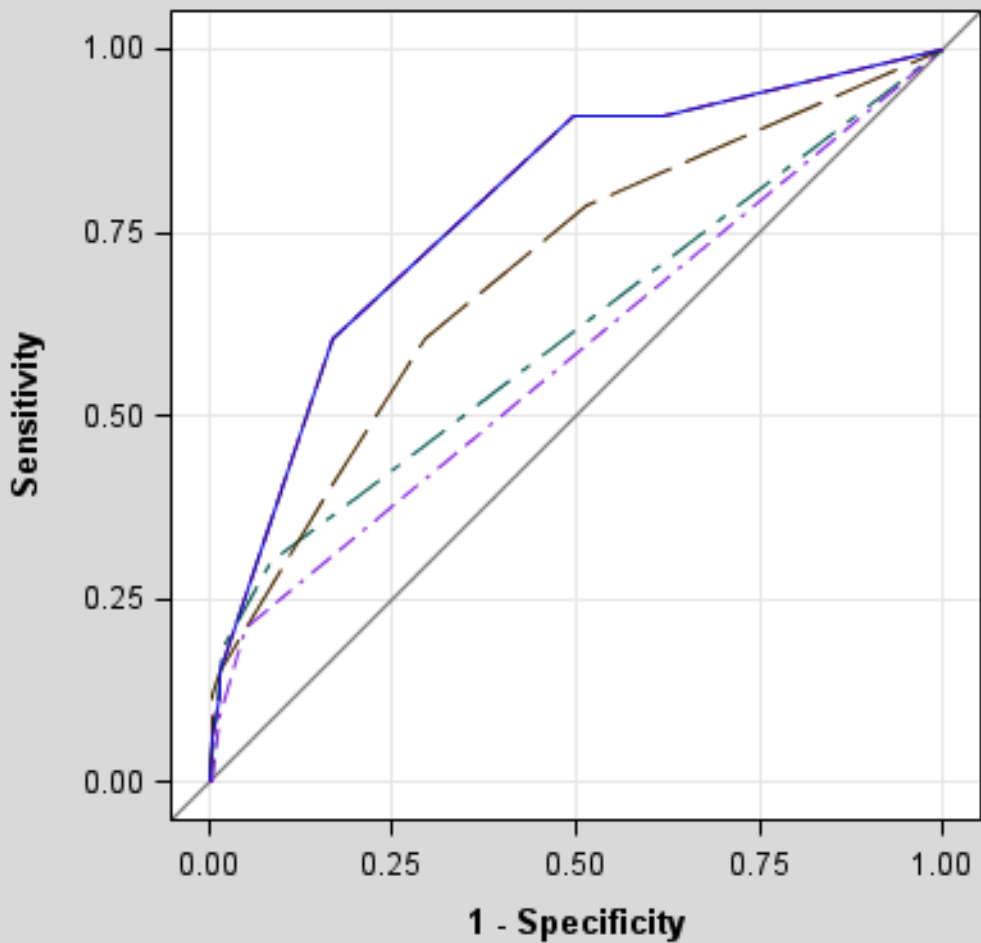

### ROC Curve (Area)

- PMHI: ECOG >0, Albumin <35g/L, >2 Metastatic sites (0.782)
- - RMI: LDH >ULN, Albumin <35g/L, >2 Metastatic sites (0.696)
- . Penel et al: Albumin <38g/L, Lymphocytes <700/mm<sup>3</sup> (0.612)
- . Bachelot et al: ECOG >1, LDH >600 IU (0.582)
